# Supplementary material for: Distribution of socioeconomic status and its association with type 2 diabetes mellitus in China rural area: Henan Rural Cohort study
Source: Research Square preprint supplement (doi:10.21203/rs.3.rs-446198/v1), 2021-05-07
Supplement: Supplementary file 1 [file 09a52881ffbd9955001029e6.docx]

Supplementary table 1. The classification and score of different socioeconomic indicators.

| **Variable** | **Score** | **Population (n,%)** |
| --- | --- | --- |
| Educational level (n, %) | | |
| Illiteracy | 0 | 6535(16.65) |
| Primary | 1 | 11037(28.11) |
| Junior high school | 2 | 15643(39.85) |
| Senior high school or above | 3 | 6044(15.40) |
| Average monthly income (RMB, n, %) | | |
| <500 | 0 | 14014(35.70) |
| 500- | 1 | 12907(32.88) |
| 1000- | 2 | 9412(23.97) |
| 2000- | 3 | 2926(7.45) |
| Marital status (n, %) | | |
| Single/widowed/separated/divorced | 0 | 4016(10.23) |
| Married/cohabiting | 1 | 35243(89.77) |

Supplementary table 2. The prevalence of T2DM in different SES-score by gender.

| SES-score | Prevalence of T2DM (n, %) | | |
| --- | --- | --- | --- |
| Total | Men | Women |
| 0 | 87(12.83) | 11(6.59) | 76(14.87) |
| 1 | 453(12.64) | 75(8.43) | 378(14.04) |
| 2 | 789(12.22) | 192(9.03) | 597(13.79) |
| 3 | 899(9.57) | 368(9.59) | 531(9.56) |
| 4 | 739(8.30) | 341(9.17) | 398(7.67) |
| 5 | 452(7.18) | 244(8.59) | 208(6.03) |
| 6 | 225(7.48) | 135(9.47) | 90(5.69) |
| 7 | 64(7.26) | 45(9.87) | 19(4.47) |
| *P* trend | <0.001 | <0.001 | <0.001 |


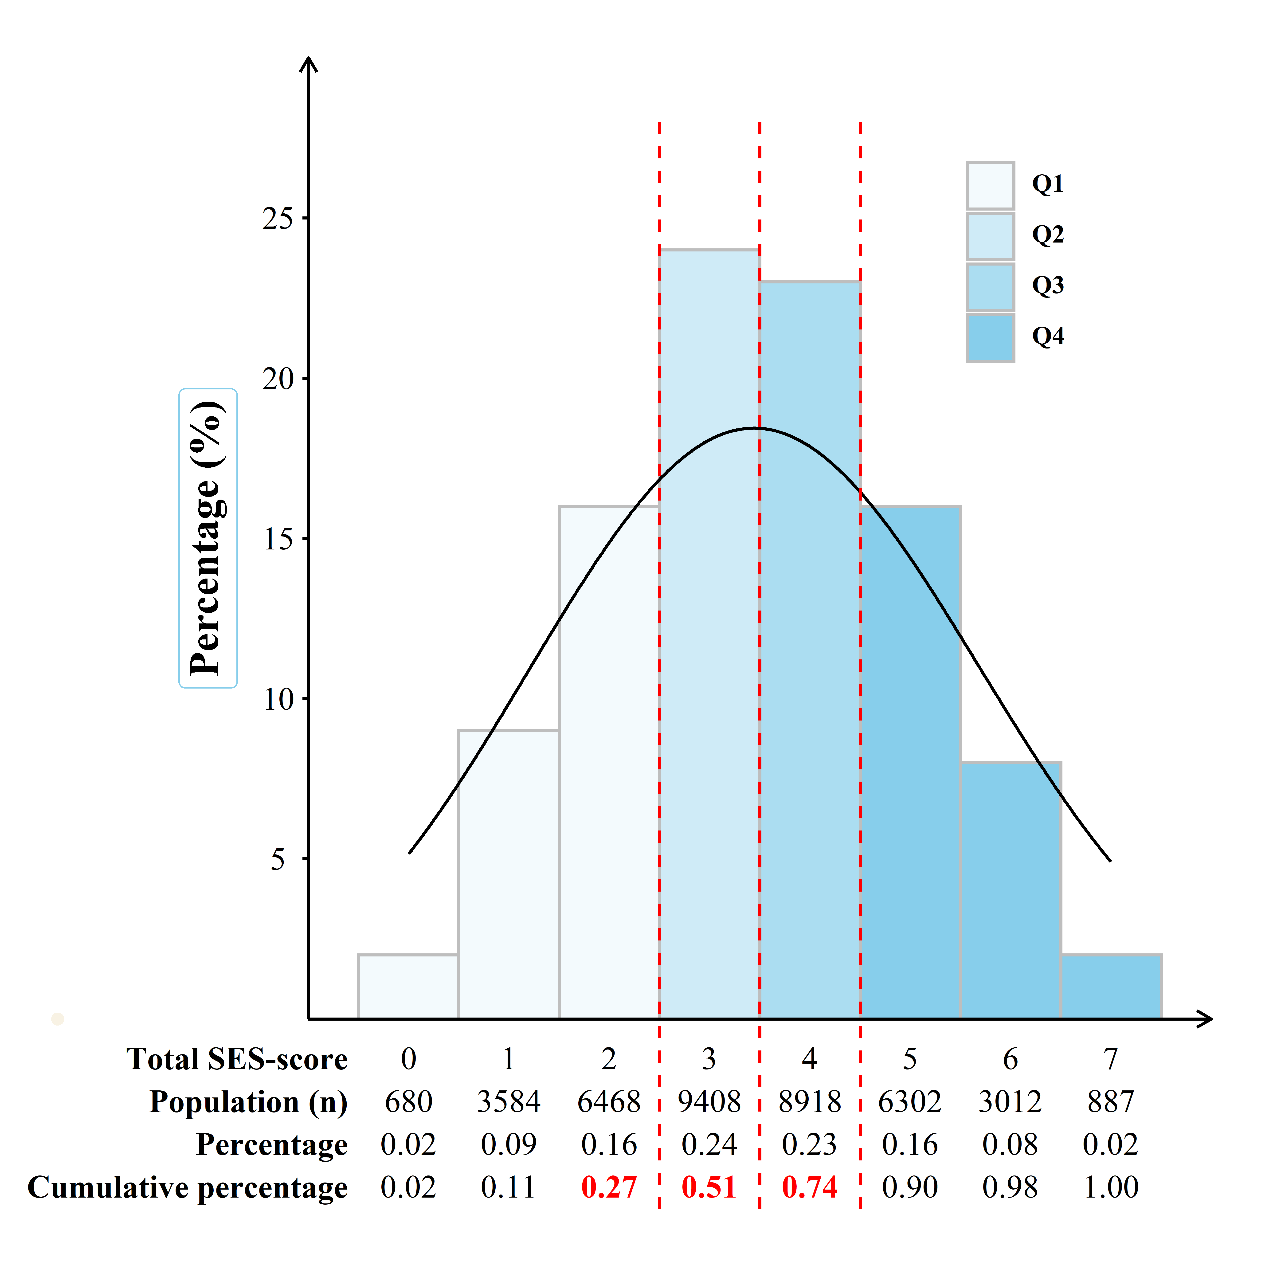


Supplementary figure 1. The distribution and classification of SES-score.
